# Supplementary material
Source: PubMed Central journal article supplement (PMC9452503)
Supplement: 41598_2022_18912_MOESM1_ESM.pdf [file 41598_2022_18912_MOESM1_ESM.pdf]

# Supplementary document S1: Structured interview

## Basic questionnaire – 2019

---

### *Sociodemographic*

Birth date: \_\_\_\_\_years

Sex:  female  
 male

Partnership status:  single living  
 partnership

#### Current job situation:

- in training
- studies
- employment:  full-time  part-time
- unemployment
- pension:  due to old age  due to disability
- other

School years (at most until A-levels): \_\_\_\_\_years

Educational level:  no training  
 skilled worker  
 technical college  
 university

#### Place of residence:

- 
- rural community (until 5000 inhabitants)
  - provincial town (>5000-20000 inhabitants)
  - medium-sized town (>20000-100000 inhabitants)
  - city (>100000 inhabitants)

Number of children: \_\_\_\_\_

Number of siblings: \_\_\_\_\_

---

## ***Clinical-neurological***

**Current pregnancy:**  no  
 yes

**Pregnancy planned in the near future:**  no  
 yes

### **Number and kind of comorbidities:**

**Disease course:**  clinically isolated syndrome (CIS)  
 relapsing-remitting multiple sclerosis (RRMS)  
 secondary progressive multiple sclerosis (SPMS)  
 primary progressive multiple sclerosis (PPMS)  
 undefined

**Clinical care:**  outpatient  
 inpatient

**Date of initial CIS/MS diagnosis (month/year):** \_\_\_\_\_

**Current Expanded Disability Status Scale (EDSS) Score:** \_\_\_\_\_

---

## **Vaccination**

**Vaccination card available:**  no  
 yes

**Did you have a vaccination consultation last year?**  no  
 yes

**When was the last time you dealt with the topic of "vaccination"?**

- last week
- last month
- last six months
- last year
- more than a year ago

**Are you aware that government recommendations for immunizations exist?**

- no
- yes

**Would you be willing to get all officially recommended vaccinations?**

- no
- yes

## SARS CoV-2 questionnaire 2020 (1<sup>st</sup> follow-up)

We have all been affected in the past weeks and are still affected in our lives due to the SARS CoV-2 pandemic and the behavioral restrictions instructed to protect the population or also due to our own experience. We would like to ask you to answer a few questions to find out how you, as an MS patient, have experienced and coped with this situation over the past eight weeks.

|                                                                                              |                          |                          |                          |                          |                          |
|----------------------------------------------------------------------------------------------|--------------------------|--------------------------|--------------------------|--------------------------|--------------------------|
| 1. Has MS changed in the last three months                                                   |                          | <b>(Please check)</b>    |                          |                          |                          |
| a) in the form of relapses?                                                                  | <b>Yes</b>               | <input type="checkbox"/> | <b>No</b>                | <input type="checkbox"/> |                          |
| b) in the form of progression ?                                                              | <b>Yes</b>               | <input type="checkbox"/> | <b>No</b>                | <input type="checkbox"/> |                          |
| 2. Did you have any other illnesses in the last three months?                                | <b>Yes</b>               | <input type="checkbox"/> | <b>No</b>                | <input type="checkbox"/> |                          |
|                                                                                              | <b>If yes, which?</b>    |                          |                          |                          |                          |
| Please answer the following questions according to the levels:                               |                          |                          |                          |                          |                          |
|                                                                                              | <b>Not at all</b>        | <b>Almost not</b>        | <b>Not sure</b>          | <b>Strong</b>            | <b>Very strong</b>       |
| 3. How much psychological burden did you feel during that time?                              | <input type="checkbox"/> | <input type="checkbox"/> | <input type="checkbox"/> | <input type="checkbox"/> | <input type="checkbox"/> |
| 4. How much physical burden did you feel during that time?                                   | <input type="checkbox"/> | <input type="checkbox"/> | <input type="checkbox"/> | <input type="checkbox"/> | <input type="checkbox"/> |
| 1. How much social burden did you feel during that time?                                     | <input type="checkbox"/> | <input type="checkbox"/> | <input type="checkbox"/> | <input type="checkbox"/> | <input type="checkbox"/> |
| 2. Did any distressing thoughts or memories related to the SARS CoV-2 pandemic come to mind? | <input type="checkbox"/> | <input type="checkbox"/> | <input type="checkbox"/> | <input type="checkbox"/> | <input type="checkbox"/> |
| 3. Did you experience distressing dreams related to the SARS CoV-2 pandemic?                 | <input type="checkbox"/> | <input type="checkbox"/> | <input type="checkbox"/> | <input type="checkbox"/> | <input type="checkbox"/> |
| 4. Did you act or feel like this was always going to happen again?                           | <input type="checkbox"/> | <input type="checkbox"/> | <input type="checkbox"/> | <input type="checkbox"/> | <input type="checkbox"/> |
| 5. Were you shocked when you were reminded of this?                                          | <input type="checkbox"/> | <input type="checkbox"/> | <input type="checkbox"/> | <input type="checkbox"/> | <input type="checkbox"/> |
| 6. Did you feel any physical reactions (such as rapid heartbeat, abdominal pain)?            | <input type="checkbox"/> | <input type="checkbox"/> | <input type="checkbox"/> | <input type="checkbox"/> | <input type="checkbox"/> |

|                                                                                                                                                                                  | <b>Not at all</b>                        | <b>Almost not</b>                      | <b>Not sure</b>          | <b>Strong</b>                                   | <b>Very strong</b>                                  |
|----------------------------------------------------------------------------------------------------------------------------------------------------------------------------------|------------------------------------------|----------------------------------------|--------------------------|-------------------------------------------------|-----------------------------------------------------|
| 7. Did you experience difficulty falling asleep or staying asleep?                                                                                                               | <input type="checkbox"/>                 | <input type="checkbox"/>               | <input type="checkbox"/> | <input type="checkbox"/>                        | <input type="checkbox"/>                            |
| 8. Did you experience increased irritability or outbursts of anger?                                                                                                              | <input type="checkbox"/>                 | <input type="checkbox"/>               | <input type="checkbox"/> | <input type="checkbox"/>                        | <input type="checkbox"/>                            |
| 9. Did you have difficulty in concentrating?                                                                                                                                     | <input type="checkbox"/>                 | <input type="checkbox"/>               | <input type="checkbox"/> | <input type="checkbox"/>                        | <input type="checkbox"/>                            |
| 10. Did you pay increased attention to possible dangers to you or others?                                                                                                        | <input type="checkbox"/>                 | <input type="checkbox"/>               | <input type="checkbox"/> | <input type="checkbox"/>                        | <input type="checkbox"/>                            |
| 11. Did you feel jumpier or startled more quickly than usual when something unexpected happened?                                                                                 | <input type="checkbox"/>                 | <input type="checkbox"/>               | <input type="checkbox"/> | <input type="checkbox"/>                        | <input type="checkbox"/>                            |
|                                                                                                                                                                                  |                                          |                                        |                          |                                                 |                                                     |
| 12. Since the impact of the SARS CoV-2 pandemic began, have your attitudes changed regarding the SARS CoV-2 issue? (Please check)                                                | <b>Yes</b>                               | <input type="checkbox"/>               |                          | <b>No</b>                                       | <input type="checkbox"/>                            |
|                                                                                                                                                                                  |                                          |                                        |                          |                                                 |                                                     |
| 13. Today, do you experience most of the measures ordered as appropriate, even in retrospect?                                                                                    | <b>Not appropriate at all</b>            | <b>Somewhat inappropriate</b>          | <b>Unsure</b>            | <b>Somewhat appropriate</b>                     | <b>Completely appropriate</b>                       |
|                                                                                                                                                                                  | <input type="checkbox"/>                 | <input type="checkbox"/>               | <input type="checkbox"/> | <input type="checkbox"/>                        | <input type="checkbox"/>                            |
|                                                                                                                                                                                  |                                          |                                        |                          |                                                 |                                                     |
| 14. Has your general attitude toward standard vaccination changed as a result of the discussions surrounding the SARS CoV-2 pandemic?                                            | <b>My anti attitude was strengthened</b> | <b>Have developed an anti attitude</b> | <b>Unchanged</b>         | <b>Accept now a general vaccination program</b> | <b>Was always in favor of a vaccination program</b> |
|                                                                                                                                                                                  | <input type="checkbox"/>                 | <input type="checkbox"/>               | <input type="checkbox"/> | <input type="checkbox"/>                        | <input type="checkbox"/>                            |
|                                                                                                                                                                                  |                                          |                                        |                          |                                                 |                                                     |
| 15. What do you think today? If an effective vaccine against SARS CoV-2 is found and the Standing Committee in Vaccination recommends this vaccination, will you get vaccinated? | <b>Very unlikely</b>                     | <b>Unlikely</b>                        | <b>Unsure</b>            | <b>Likely</b>                                   | <b>For sure</b>                                     |
|                                                                                                                                                                                  | <input type="checkbox"/>                 | <input type="checkbox"/>               | <input type="checkbox"/> | <input type="checkbox"/>                        | <input type="checkbox"/>                            |

Questions 4 – 13 adapted from Trauma Screening Questionnaire (TSQ) Brewin et al. (2002) Br. J. Psychiatry

## SARS CoV-2 questionnaire 2021 (2<sup>nd</sup> follow-up)

We have all been affected in the past weeks and are still affected in our lives due to the SARS CoV-2 pandemic and the behavioral restrictions instructed to protect the population or also due to our own experience. We would like to ask you to answer a few questions to find out how you, as an MS patient, have experienced and coped with this situation over the past eight weeks.

|                                                                                        |                                                                   |                          |                                                                 |                                                      |
|----------------------------------------------------------------------------------------|-------------------------------------------------------------------|--------------------------|-----------------------------------------------------------------|------------------------------------------------------|
| 1. Has MS changed in the last three months                                             |                                                                   |                          |                                                                 | <b>(Please check)</b>                                |
| a) in the form of relapses?                                                            | <b>Yes</b>                                                        | <input type="checkbox"/> | <b>No</b>                                                       | <input type="checkbox"/>                             |
| b) in the form of progression ?                                                        | <b>Yes</b>                                                        | <input type="checkbox"/> | <b>No</b>                                                       | <input type="checkbox"/>                             |
| 2. Did you have any other illnesses in the last three months?                          |                                                                   |                          |                                                                 | <input type="checkbox"/>                             |
|                                                                                        | <b>Yes</b>                                                        | <input type="checkbox"/> | <b>No</b>                                                       | <input type="checkbox"/>                             |
|                                                                                        | <b>If yes, which?</b>                                             |                          |                                                                 |                                                      |
| 3. Did you have any vaccinations (of any kind) in the last three months?               |                                                                   |                          |                                                                 | <input type="checkbox"/>                             |
|                                                                                        | <b>Yes</b>                                                        | <input type="checkbox"/> | <b>No</b>                                                       | <input type="checkbox"/>                             |
|                                                                                        | <b>If yes, which?</b>                                             |                          |                                                                 |                                                      |
|                                                                                        | <b>Did you experience health issues during/after vaccination?</b> | <b>No</b>                | <b>Yes, mild vaccine reactions</b>                              | <b>Yes, vaccine diseases / complications</b>         |
|                                                                                        |                                                                   | <input type="checkbox"/> | <input type="checkbox"/>                                        | <input type="checkbox"/>                             |
| 4. Were you ill with coronavirus (SARS-CoV-2) or did you have a positive antigen test? |                                                                   |                          |                                                                 | <input type="checkbox"/>                             |
|                                                                                        | <b>If yes, did you experience</b>                                 | <b>No symptoms</b>       | <b>Mild/moderate symptoms being treated on outpatient basis</b> | <b>Severe symptoms requiring inpatient treatment</b> |
|                                                                                        |                                                                   | <input type="checkbox"/> | <input type="checkbox"/>                                        | <input type="checkbox"/>                             |

| Please answer the following questions according to the levels:                                                                    |                          |                          |                          |                          |                          |
|-----------------------------------------------------------------------------------------------------------------------------------|--------------------------|--------------------------|--------------------------|--------------------------|--------------------------|
|                                                                                                                                   | <b>Not at all</b>        | <b>Almost not</b>        | <b>Not sure</b>          | <b>Strong</b>            | <b>Very strong</b>       |
| 5. How much psychological burden did you feel during the last three months?                                                       | <input type="checkbox"/> | <input type="checkbox"/> | <input type="checkbox"/> | <input type="checkbox"/> | <input type="checkbox"/> |
| 6. How much physical burden did you feel during the last three months?                                                            | <input type="checkbox"/> | <input type="checkbox"/> | <input type="checkbox"/> | <input type="checkbox"/> | <input type="checkbox"/> |
| 7. How much social burden did you feel during the last three months?                                                              | <input type="checkbox"/> | <input type="checkbox"/> | <input type="checkbox"/> | <input type="checkbox"/> | <input type="checkbox"/> |
| 8. Did any distressing thoughts or memories related to the SARS CoV-2 pandemic come to mind?                                      | <input type="checkbox"/> | <input type="checkbox"/> | <input type="checkbox"/> | <input type="checkbox"/> | <input type="checkbox"/> |
| 9. Did you experience distressing dreams related to the SARS CoV-2 pandemic?                                                      | <input type="checkbox"/> | <input type="checkbox"/> | <input type="checkbox"/> | <input type="checkbox"/> | <input type="checkbox"/> |
| 10. Did you act or feel like this was always going to happen again?                                                               | <input type="checkbox"/> | <input type="checkbox"/> | <input type="checkbox"/> | <input type="checkbox"/> | <input type="checkbox"/> |
| 11. Were you shocked when you were reminded of this?                                                                              | <input type="checkbox"/> | <input type="checkbox"/> | <input type="checkbox"/> | <input type="checkbox"/> | <input type="checkbox"/> |
| 12. Did you feel any physical reactions (such as rapid heartbeat, abdominal pain)?                                                | <input type="checkbox"/> | <input type="checkbox"/> | <input type="checkbox"/> | <input type="checkbox"/> | <input type="checkbox"/> |
|                                                                                                                                   | <b>Not at all</b>        | <b>Almost not</b>        | <b>Not sure</b>          | <b>Strong</b>            | <b>Very strong</b>       |
| 13. Did you experience difficulty falling asleep or staying asleep?                                                               | <input type="checkbox"/> | <input type="checkbox"/> | <input type="checkbox"/> | <input type="checkbox"/> | <input type="checkbox"/> |
| 14. Did you experience increased irritability or outbursts of anger?                                                              | <input type="checkbox"/> | <input type="checkbox"/> | <input type="checkbox"/> | <input type="checkbox"/> | <input type="checkbox"/> |
| 15. Did you have difficulty in concentrating?                                                                                     | <input type="checkbox"/> | <input type="checkbox"/> | <input type="checkbox"/> | <input type="checkbox"/> | <input type="checkbox"/> |
| 16. Did you pay increased attention to possible dangers to you or others?                                                         | <input type="checkbox"/> | <input type="checkbox"/> | <input type="checkbox"/> | <input type="checkbox"/> | <input type="checkbox"/> |
| 17. Did you feel jumpier or startled more quickly than usual when something unexpected happened?                                  | <input type="checkbox"/> | <input type="checkbox"/> | <input type="checkbox"/> | <input type="checkbox"/> | <input type="checkbox"/> |
| 18. Since the impact of the SARS CoV-2 pandemic began, have your attitudes changed regarding the SARS CoV-2 issue? (Please check) | <b>Yes</b>               | <input type="checkbox"/> | <b>No</b>                | <input type="checkbox"/> |                          |

|                                                                                                                                                                                  |                                                   |                                           |                          |                                                    |                                                        |
|----------------------------------------------------------------------------------------------------------------------------------------------------------------------------------|---------------------------------------------------|-------------------------------------------|--------------------------|----------------------------------------------------|--------------------------------------------------------|
| 19. Today, do you experience most of the measures ordered as appropriate, even in retrospect?                                                                                    | <b>Not appropriate at all</b>                     | <b>Somewhat inappropriate</b>             | <b>Unsure</b>            | <b>Somewhat appropriate</b>                        | <b>Completely appropriate</b>                          |
|                                                                                                                                                                                  | <input type="checkbox"/>                          | <input type="checkbox"/>                  | <input type="checkbox"/> | <input type="checkbox"/>                           | <input type="checkbox"/>                               |
| 20. Has your general attitude toward standard vaccination changed as a result of the discussions surrounding the SARS CoV-2 pandemic since the last survey (summer 2020)?        | <b>1. My anti attitude was strengthened</b>       | <b>2. Have developed an anti attitude</b> | <b>3. Unchanged</b>      | <b>4. Accept now a general vaccination program</b> | <b>5. Was always in favor of a vaccination program</b> |
|                                                                                                                                                                                  | <input type="checkbox"/>                          | <input type="checkbox"/>                  | <input type="checkbox"/> | <input type="checkbox"/>                           | <input type="checkbox"/>                               |
|                                                                                                                                                                                  | <b>If 1., 2. or 4., what was the main reason?</b> |                                           |                          |                                                    |                                                        |
| 21. What do you think today? If an effective vaccine against SARS CoV-2 is found and the Standing Committee in Vaccination recommends this vaccination, will you get vaccinated? | <b>Very unlikely</b>                              | <b>Unlikely</b>                           | <b>Unsure</b>            | <b>Likely</b>                                      | <b>For sure</b>                                        |
|                                                                                                                                                                                  | <input type="checkbox"/>                          | <input type="checkbox"/>                  | <input type="checkbox"/> | <input type="checkbox"/>                           | <input type="checkbox"/>                               |
| 22. Would you prefer a certain vaccine?                                                                                                                                          | <b>Yes</b>                                        |                                           | <input type="checkbox"/> | <b>No</b>                                          |                                                        |
|                                                                                                                                                                                  | <b>If yes, due to</b>                             | <b>Efficacy</b>                           | <b>Tolerability</b>      | <b>Availability</b>                                | <b>Other</b>                                           |
|                                                                                                                                                                                  |                                                   | <input type="checkbox"/>                  | <input type="checkbox"/> | <input type="checkbox"/>                           | <input type="checkbox"/>                               |
| Questions 6 – 15 adapted from Trauma Screening Questionnaire (TSQ) Brewin et al. (2002) Br. J. Psychiatry                                                                        |                                                   |                                           |                          |                                                    |                                                        |
